# Supplementary material
Source: PubMed Central journal article supplement (PMC7039070)
Supplement: NIHMS1556509-supplement-1.pdf [file NIHMS1556509-supplement-1.pdf]

**Supplemental Table 1: Primers**

| Primer Name | For/Rev | Domain          | Sequence                                             | Priming Site |
|-------------|---------|-----------------|------------------------------------------------------|--------------|
| FLAJ1701    | F       | IgM1 V region   | 5'-TTCAATCTTGGCAACGAC-3'                             | FNLGND       |
| FLAJ1703    | F       | IgM1 V region   | 5'-GTTTCGATCTTGACAGCTATG-3'                          | FDLDSY       |
| FLAJ1699    | F       | IgW1 V region   | 5'-TCTGAGATCACGCTGACC-3'                             | SEITLT       |
| MFC185      | F       | IgW2 V region   | 5'-TATAATGGAAGGATTTTCAGAGATCGTCCTGAGACAGCCCGAG-3'    | EIVLRQPE     |
| MFC239      | F       | IgMV1 FR3       | 5'-AACCTGAAGATCGAAGACACC-3'                          | NLKIEDT      |
| MFC214      | F       | IgMV2 FR3       | 5'-CTGCGTCCAAAGACACTTCA-3'                           | ASKDTS       |
| MFC215      | F       | IgWV1 FR3       | 5'-CCAAGGACAGCGACACAGTA-3'                           | KSDSTV       |
| FLAJ861     | F       | TCRδV1          | 5'-ATCATTTCGAGGCTGCAGTTGACT-3'                       | IISRLQLT     |
| FLAJ862     | F       | TCRδV2          | 5'-ACTGTCACTGGGTTACAACTGACC-3'                       | TVTGLQLT     |
| FLAJ863     | F       | TCRδV3          | 5'-ACTATCAATGGGCTAGAACTCACT-3'                       | TINGLELT     |
| FLAJ864     | F       | TCRδV4          | 5'-ACTATAACTGGGCTGCAGCTGACT-3'                       | TITGLQLT     |
| FLAJ865     | F       | TCRδV5          | 5'-ACTATCGCTGGACTACAGCTGACT-3'                       | TIAGLQLT     |
| FLAJ866     | F       | TCRδV6          | 5'-ATAATCTCTCGAACACAACACTGAGT-3'                     | IISRTQLS     |
| FLAJ867     | F       | TCRδV7          | 5'-AAGATCTCCACATTACAACTGAGT-3'                       | KISTLQLS     |
| FLAJ868     | F       | TCRδV8          | 5'-AAGATCTCTGCAATACAACTGAAT-3'                       | KISAIQLN     |
| FLAJ869     | F       | TCRδV9          | 5'-ATAATCTCTCGAGCACAACACTGAGT-3'                     | IISRAQLS     |
| FLAJ870     | F       | TCRδV10         | 5'-TCTATCTCGGAGCTGCAACTGTCT-3'                       | SISELQLS     |
| FLAJ871     | F       | TCRδV11         | 5'-AAAATAGCAGCTGTTTCTCCCTCT-3'                       | KIAAVSPS     |
| FLAJ872     | F       | TCRδV12         | 5'-ACGATCTCGGAGGTGCTGCTCACT-3'                       | TISEVLLT     |
| FLAJ873     | F       | TCRδV13         | 5'-ACCATCCGTGATCTGCGACTGTCT-3'                       | TIRDLRLS     |
| FLAJ874     | F       | TCRδV14         | 5'-AGAATTAATGAAACCCGTCTGTCT-3'                       | RINETRLS     |
| FLAJ710     | R       | TCRδ cyto. tail | 5'-AGAAATCCAGACTCGGGCAG-3'                           | ARVWIS       |
| FLAJ767     | R       | TCRδ C          | 5'-CTGAACGCCACATAGCTGCCA-3'                          | GSYVAFS      |
| MFC132      | R       | IgM C1          | 5'-TGACAGGAGGAGACGAGACC-3'                           | GLVSSCQ      |
| MFC242      | R       | TCRδ C          | 5'-TCTTTGCTTGAGGATTTTGGTG-3'                         | PKSSSKD      |
| MFC243      | R       | TCRδ C          | 5'-CAGACAGACTGCAGCTTGG-3'                            | QAAVCL       |
| MFC133      | R       | IgM C1          | 5'-ATCGCCAAACAACCAAAAAT-3'                           | IFGCLAM      |
| MFC225      | R       | IgW C1          | 5'-TCACACGAAGGATTAGAGATG-3'                          | ISNPSCD      |
| MFC180      | F       | IgMV FR1        | 5'-TATGATGGAAGGATTTACAAATTATTTTACTCAAAAAGTGCCAGAA-3' | QIILTQKVAE   |
| MFC181      | R       | IgMV1 J         | 5'-TATTATAAGCTTTCAAGTCACGGTCACCATGGTCCCTTG-3'        | QGTMTVT      |
| MFC182      | F       | IgWV1 FR1       | 5'-TATAATGGAAGGATTTTCAGAGATCACGCTGACCCAGCCCGAG-3'    | EITLTQPE     |
| MFC183      | R       | IgWV J          | 5'-TATTACAAGCTTGTCATGAAGTCACTCCAGAAAGGTTCCGCT-3'     | SGTFLEVTS    |
| MFC184      | F       | IgW2 FR1        | 5'-TATAATGGAAGGATTTTCAGAGATCACGCTGACCCAGCCCAAG-3'    | EITLTQPK     |

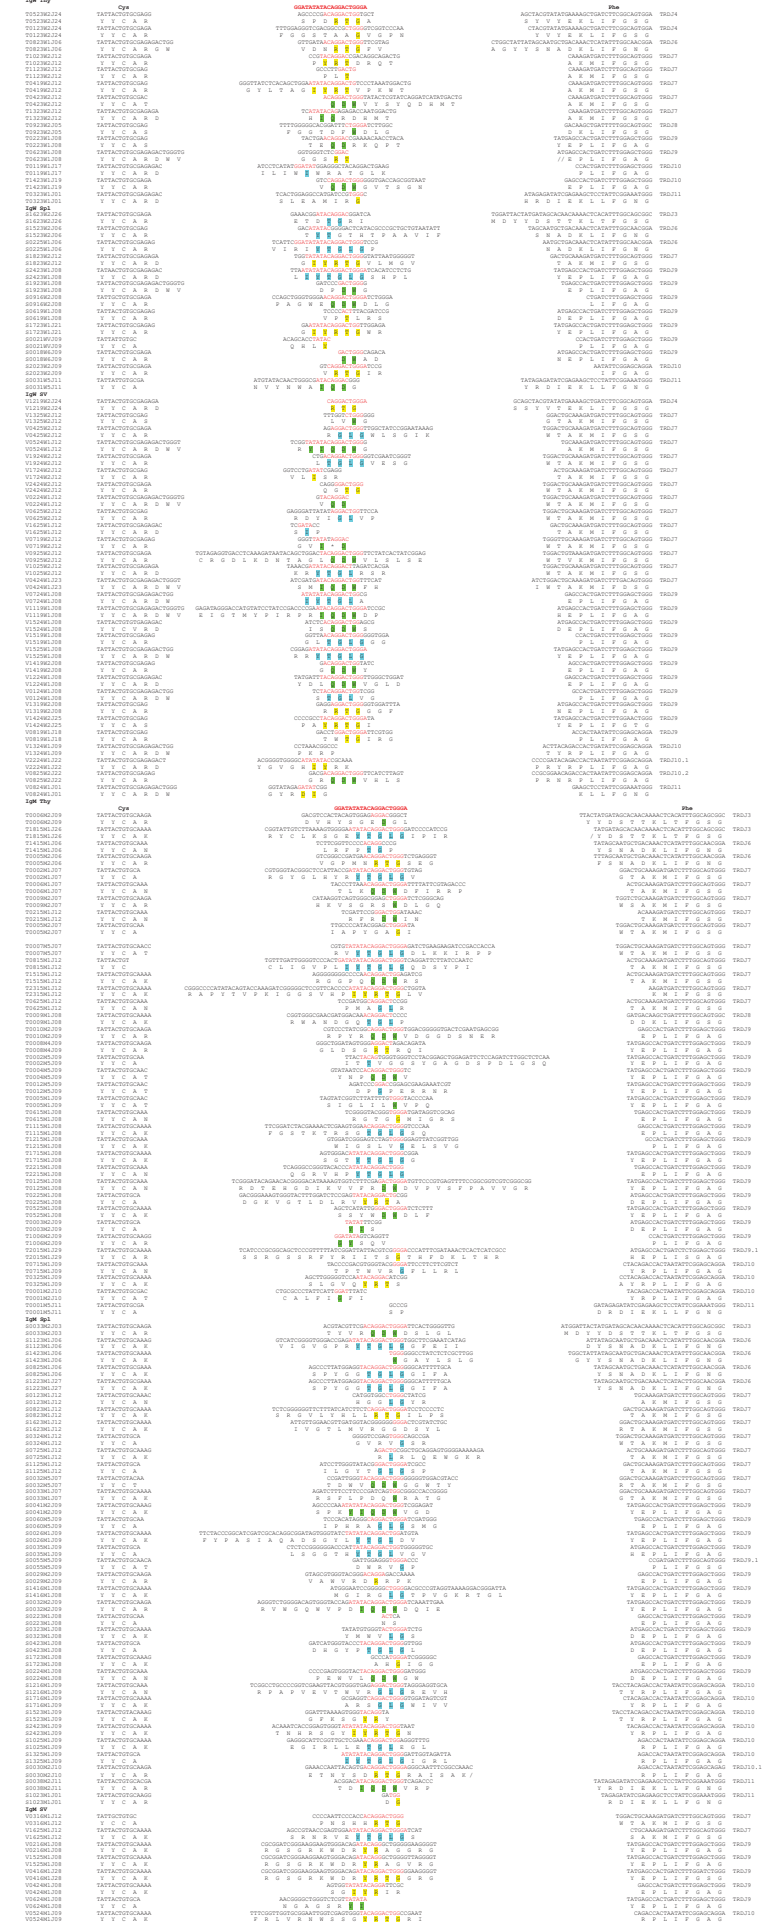

Supplemental Figure 1. Nucleotide alignment of Ig-TCRδ CDR3 region. Nucleotide alignments of Ig-TCRδ transcripts from thymus (Thy), spleen (Spl), and spiral valve (SV) are displayed with accompanying amino acid residues. The contributing IghV class and group are denoted in the second column preceding the nucleotide alignment. The TCRδJ used in the rearrangements are labelled immediately following the nucleotide alignment. The TRDD1 originating nucleotides are highlighted in red with the accompanying amino acid residues highlighted according to the frame the D-segment is read in (frame 1-green, frame 2-yellow, frame 3-cyan). The Cys and Phe residues highlighted above the nucleotide indicate the 5' and 3' CDR3 boundaries respectively.

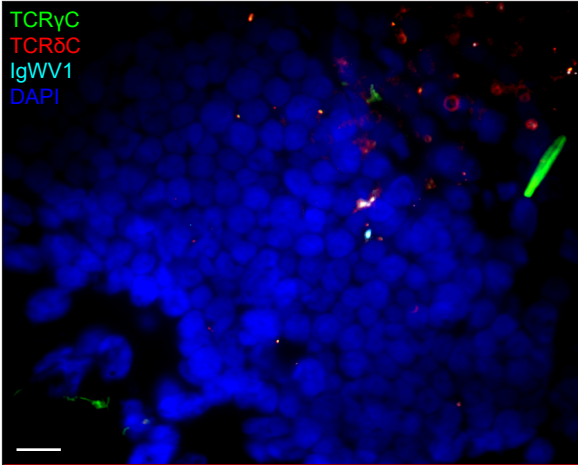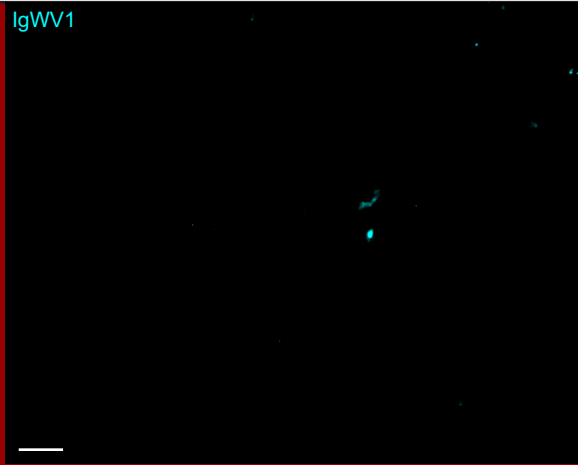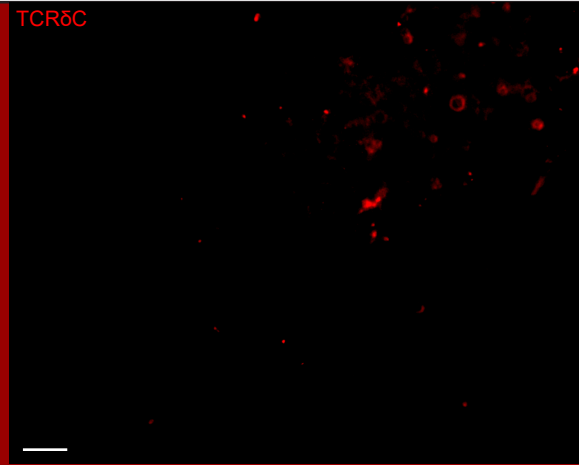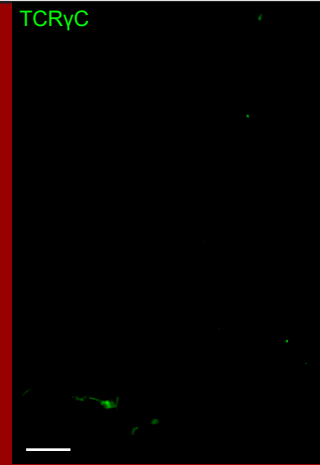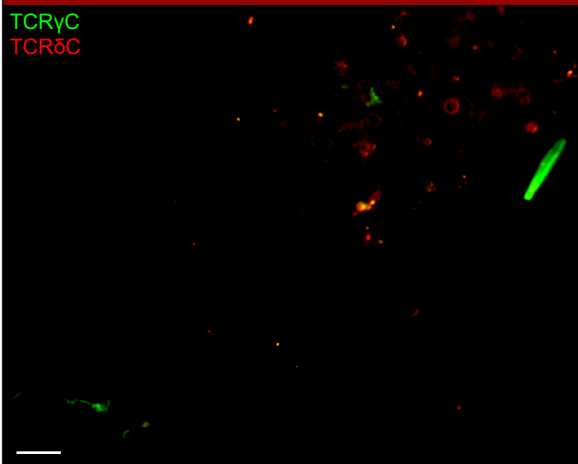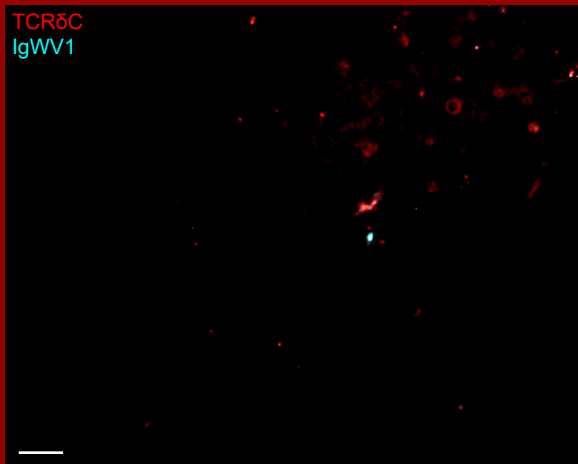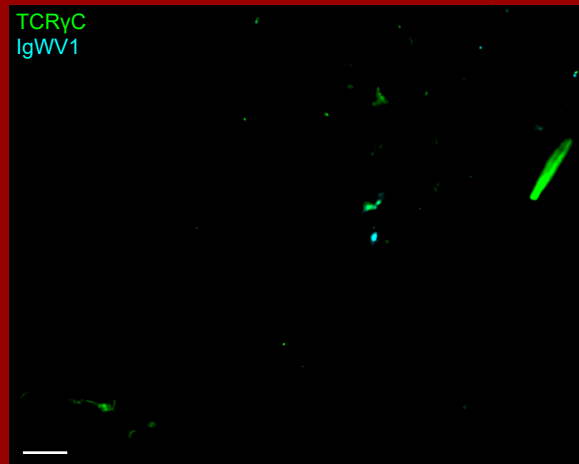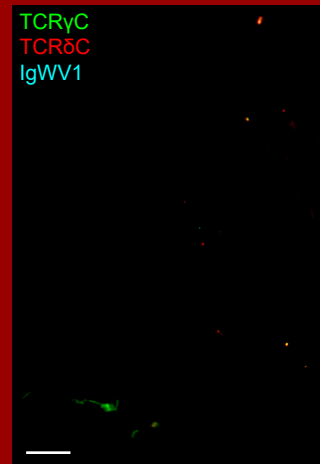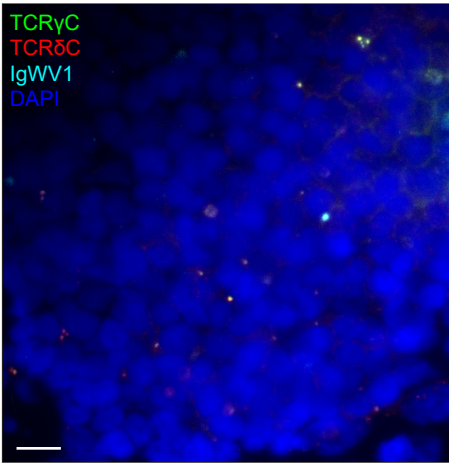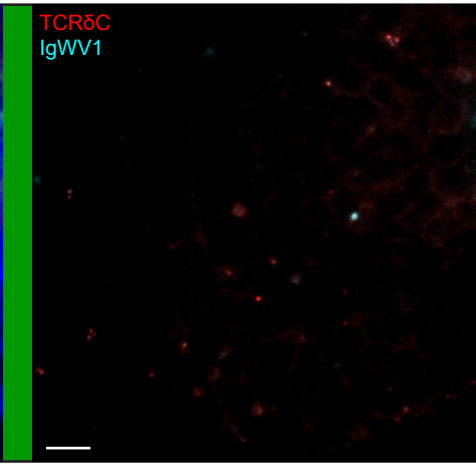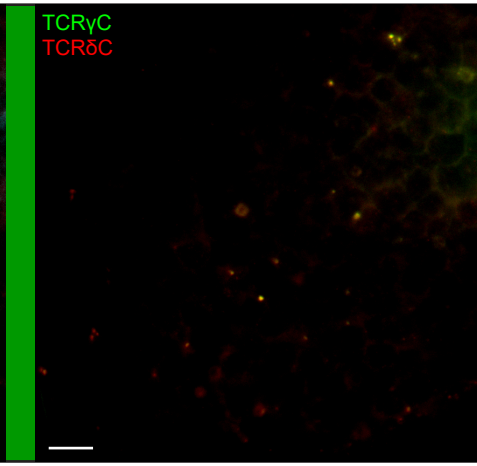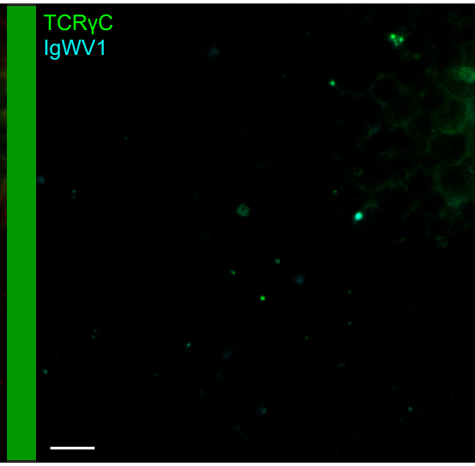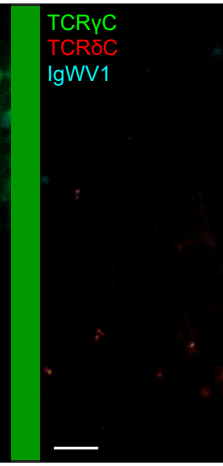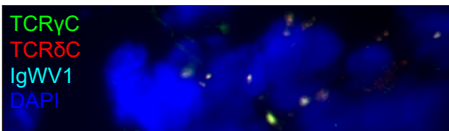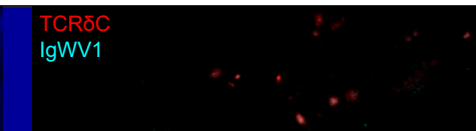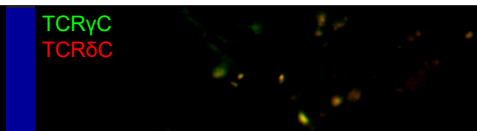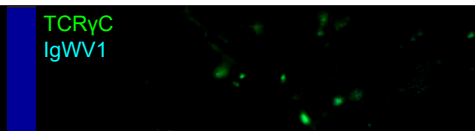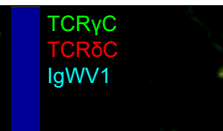

A.

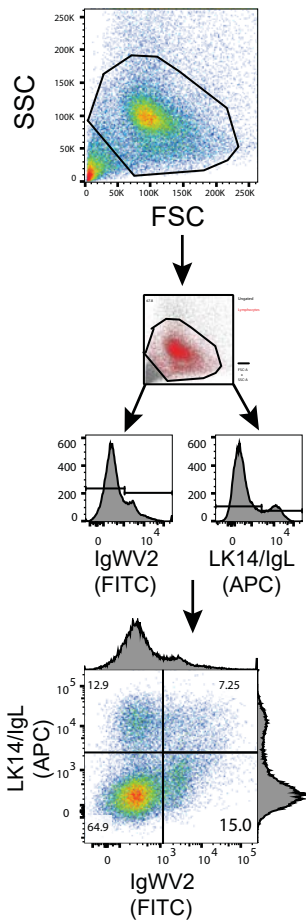

B.

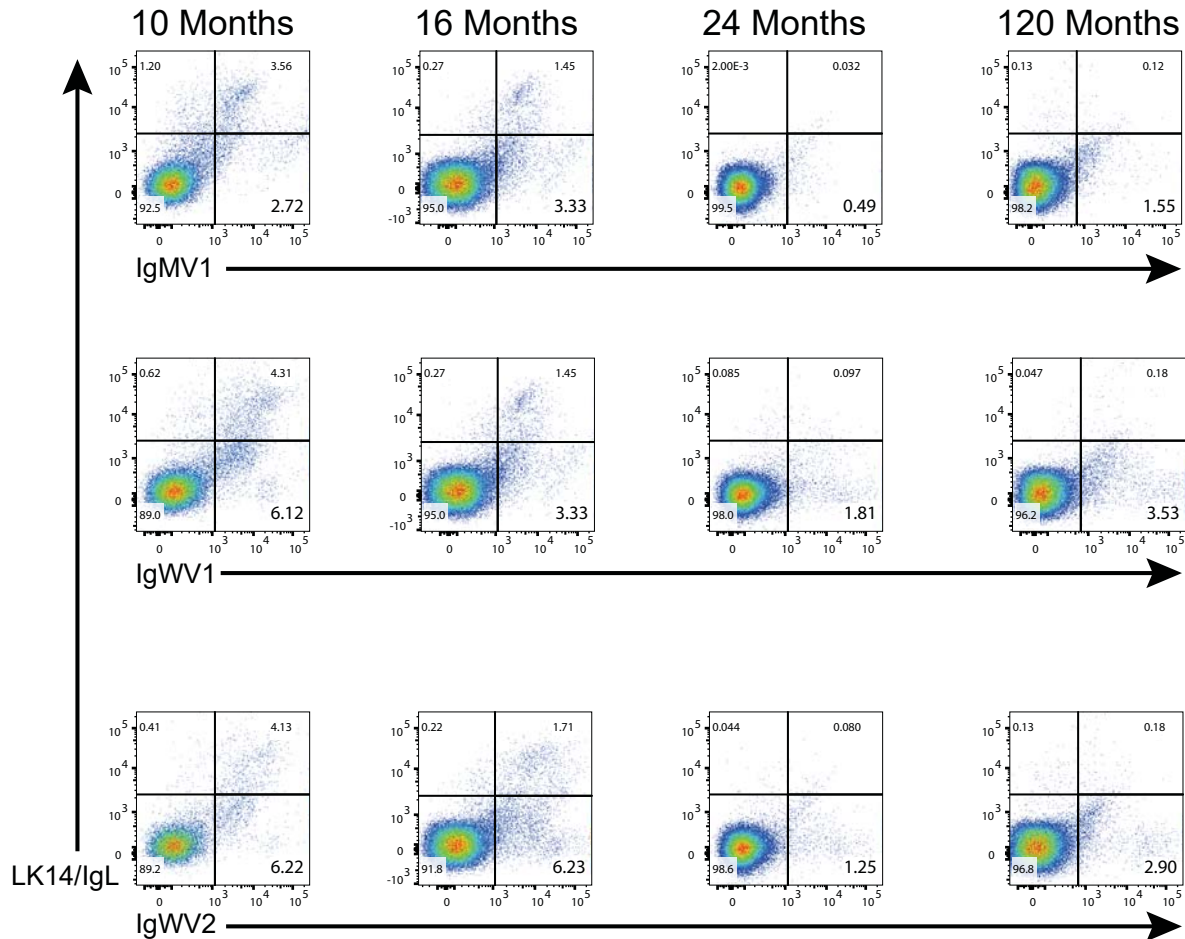

**Supplemental Figure 3. Flow cytometric analysis with Ig specific polyclonal antibodies evince IgHV-TCR $\delta$  as a cell surface receptor.** (A) Gating and signal threshold workflow using splenic lymphocytes. Lymphocyte populations were isolated using forward and side scatter (top, selected cells red in middle). Thresholds for quadrant gating was determined via histogram analysis of the FITC (IgHV polyclonal) and APC (LK14) channels (middle and bottom). All samples were analyzed with identical threshold parameters except the 120-month sample, which had lower overall fluorescent intensity. (B) Quadrant plots and population percentages for sorted thymic lymphocytes. Anti-IgHV polyclonal fluorescent intensity is plotted on the x-axis, while anti-LK14/IgL intensity is plotted on the y-axis. Quadrants were all determined using splenic controls that did not diverge amongst groups except the aforementioned 120-month sample. The bottom left quadrant houses T cells (percentages in enlarged text), while the top right houses B cell populations. The bottom right quadrant, housing cells that were IgHV+/IgL- are the prospective IgHV-TCR $\delta$  chimeric receptor bearing cells.
